# Supplementary material for: A novel electroluminescent device based on a reduced graphene oxide wrapped phosphor (ZnS:Cu,Al) and hexagonal-boron nitride for high-performance luminescence
Source: Royal Society of Chemistry journal article supplement (doi:10.1039/c6nr09302g), 2017-01-01
Supplement: c6nr09302g1.pdf [file c6nr09302g1.pdf]

## **†Electronic Supplementary Information (ESI)**

### **A novel electroluminescent device based on reduced graphene oxide wrapped phosphor (ZnS:Cu, Al) and hexagonal-boron nitride for high-performance luminescence**

Bipin Kumar Gupta,<sup>\*a</sup> Satbir Singh,<sup>‡a,b</sup> Garima Kedawat,<sup>‡c</sup> Kanika,<sup>‡a</sup> Pawan Kumar,<sup>a,b</sup> Amit Kumar Gangwar,<sup>a,b</sup> Tharangattu N. Narayanan,<sup>d</sup> Angel A. Marti,<sup>e,f</sup> Robert Vajtai<sup>e</sup> and P. M. Ajayan<sup>e</sup>

<sup>a</sup>*Luminescent Materials and Devices Group, Materials Physics and Engineering Division, CSIR- National Physical Laboratory, Dr K S Krishnan Road, New Delhi, 110012, India.*

<sup>b</sup>*Academy of Scientific and Innovative Research (AcSIR), CSIR-National Physical Laboratory Campus, Dr K S Krishnan Road, New Delhi 110012, India*

<sup>c</sup>*Department of Physics, Dyal Singh College, University of Delhi, New Delhi, 110003 India*

<sup>d</sup>*TIFR- Center for Interdisciplinary sciences, Tata Institute fundamental research, Hyderabad-500075,India.*

<sup>e</sup>*Department of Material Science & Nano Engineering Rice University, Houston, TX 77005, USA*

<sup>f</sup>*Department of Chemistry and Bioengineering, Rice University, Houston, Texas 77005, USA.*

<sup>\*</sup>*Corresponding author [Tel:+91-11-45608284](tel:+91-11-45608284), Fax: +91-11-45609310*

*E-mail address: [bipinbhu@yahoo.com](mailto:bipinbhu@yahoo.com)*

## Synthesis of ZnS:Cu, Al Phosphor by Wet Chemical Method

2.5 gm  $\text{ZnCl}_2$  dissolve in 50 ml ethanol

$\text{CuCl}_2$  and  $\text{AlCl}_3$  dissolved in ethanol with conc. 0.003 and 0.004 M (mol/liter)

Solution mixed under stirring  
PH ~4 adjust using HCl

Add  $(\text{NH}_4)_2\text{S}$  aqueous solution with ethanol 0.4 M drop by drop under vigorous stirring

Resultant yellowish white precipitate was separated by centrifuge and washed thrice with ethanol and dry at  $60^\circ\text{C}$

Collected sample mixed with 1wt % sulfur powder and heat at  $800^\circ\text{C}$  for 45 min in reduced  $\text{Ar}/\text{H}_2$  atmosphere

**Scheme S1:** Flow chart for the synthesis of ZnS:Cu,Al phosphor by chemical solution method.

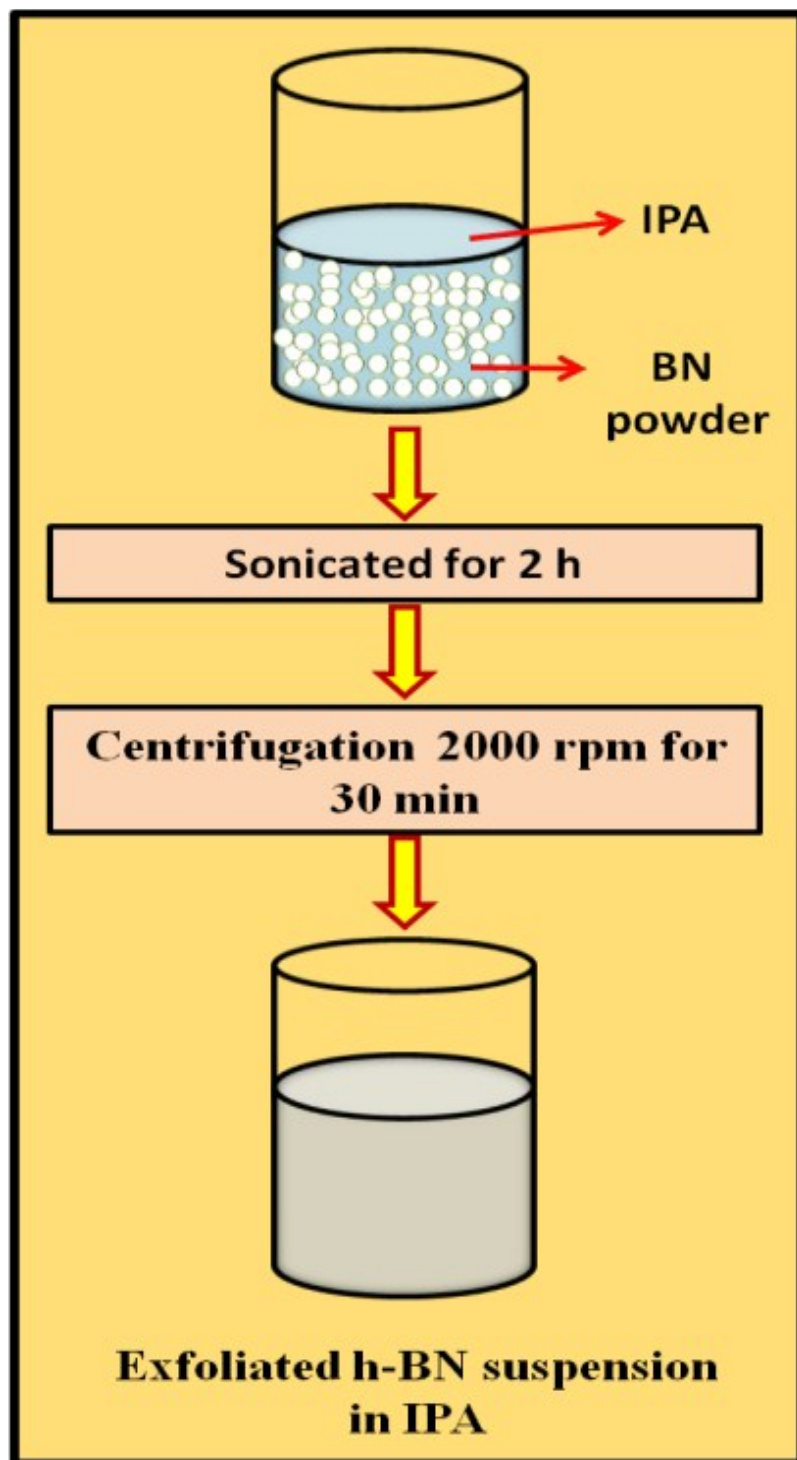

**Scheme S2.** Schematic diagram for synthesis of exfoliated h-BN layer.

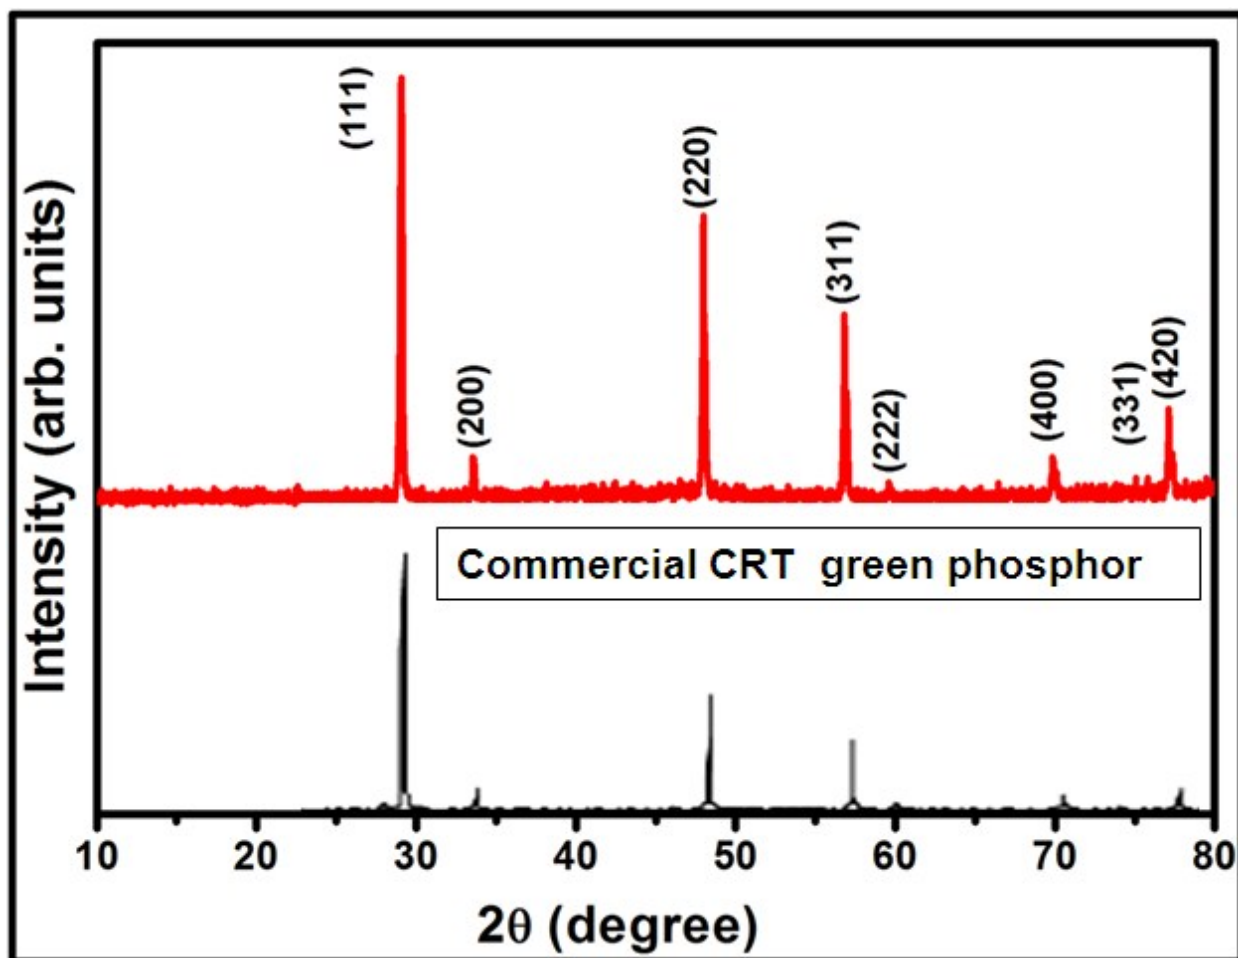

**Fig. S1:** XRD pattern of ZnS: Cu,Al phosphor; commercially available sample (black spectrum) and the modified wet-chemical synthesized sample (red spectrum).

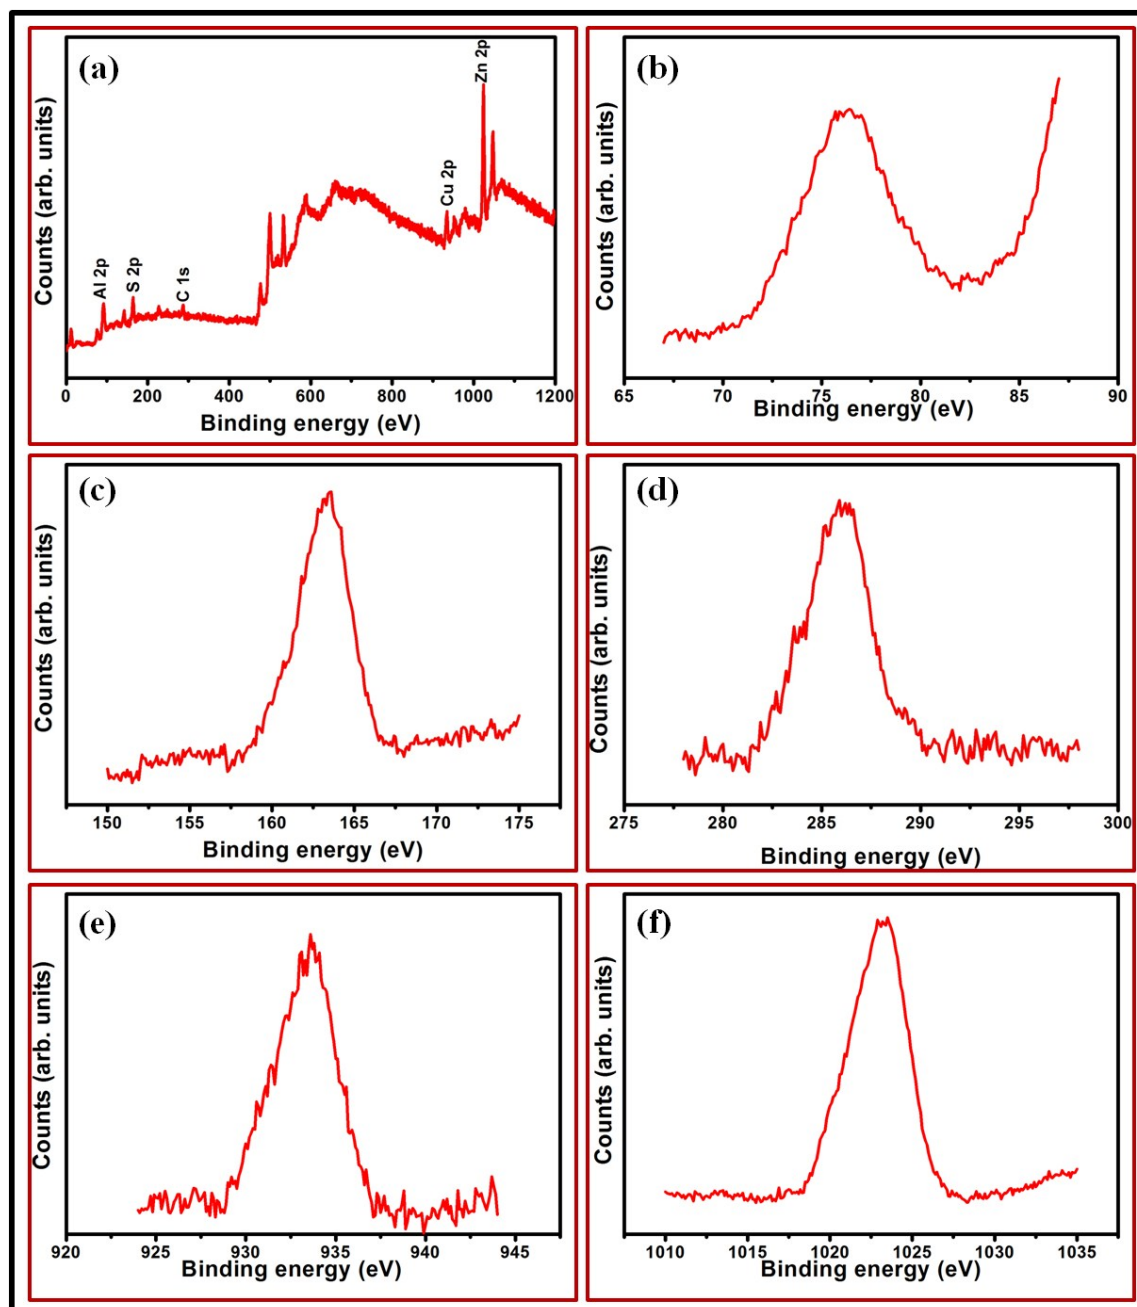

**Fig. S2:** (a) survey-scanned XPS spectrum of the as-synthesized ZnS:Cu,Al phosphor, XPS core level spectra of (b) Al2p, (c) S2p, (d) C1s, (e) Cu2p and (f) Zn2p regions for the ZnS:Cu,Al phosphor.

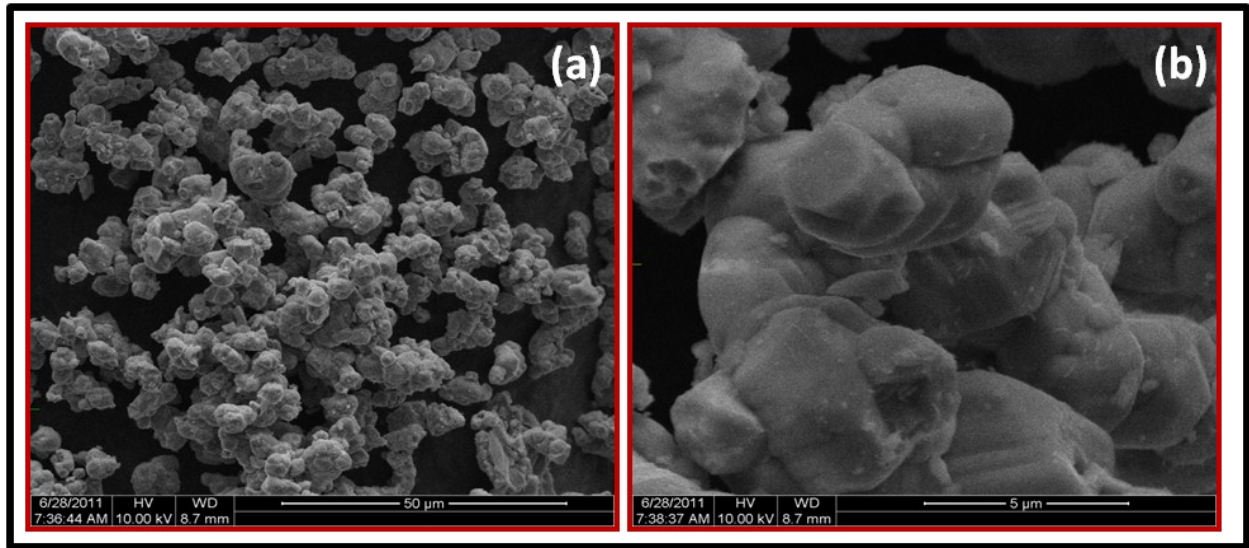

**Fig. S3:** (a) SEM image of ZnS : Cu, Al phosphor sample and (b) enlarge view of (a).

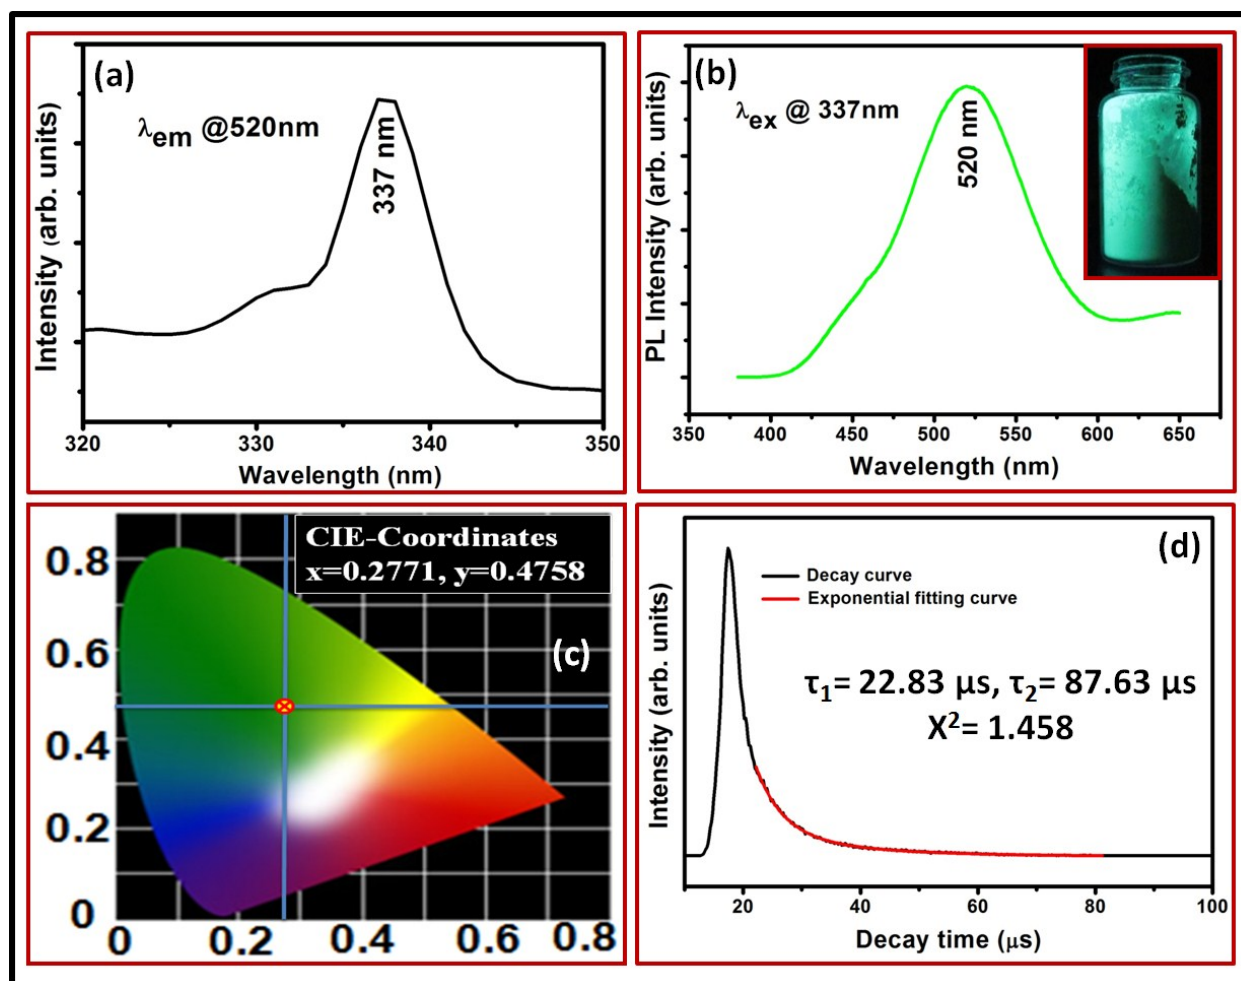

**Fig. S4.** (a) PLE and (b) PL spectrum of ZnS : Cu, Al phosphor sample and inset shows the optical photograph of the ZnS : Cu, Al phosphor sample excited by wavelengths of a 365 nm UV lamp, showing that the strong green emission is largely enhanced, (c) CIE coordinates from emission spectrum of ZnS : Cu, Al phosphor and (d) Time-resolved photoluminescence decay spectra with a fitting curve and their corresponding parameters of ZnS : Cu, Al phosphor .

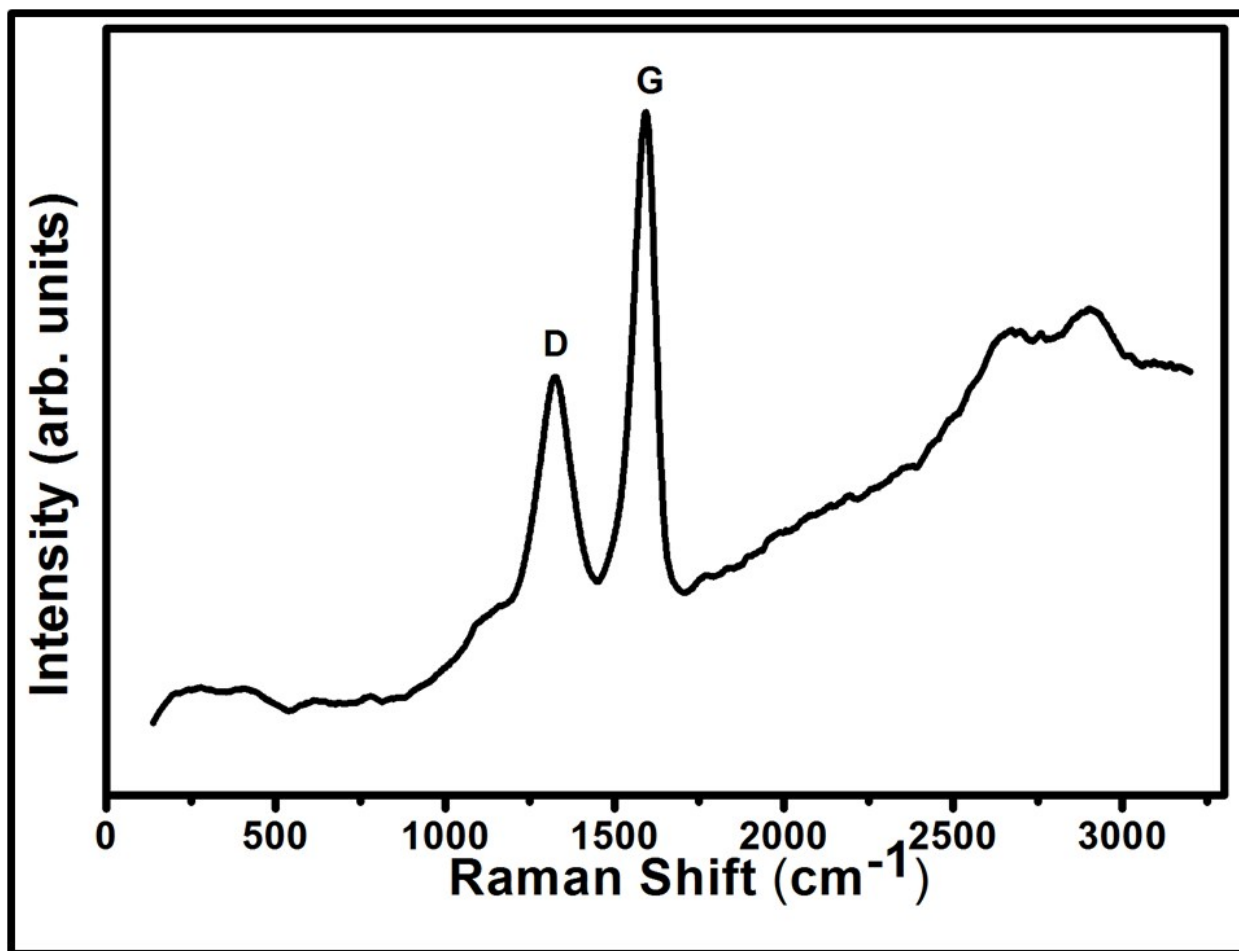

Fig. S5: Raman spectrum of as-synthesized rGO.



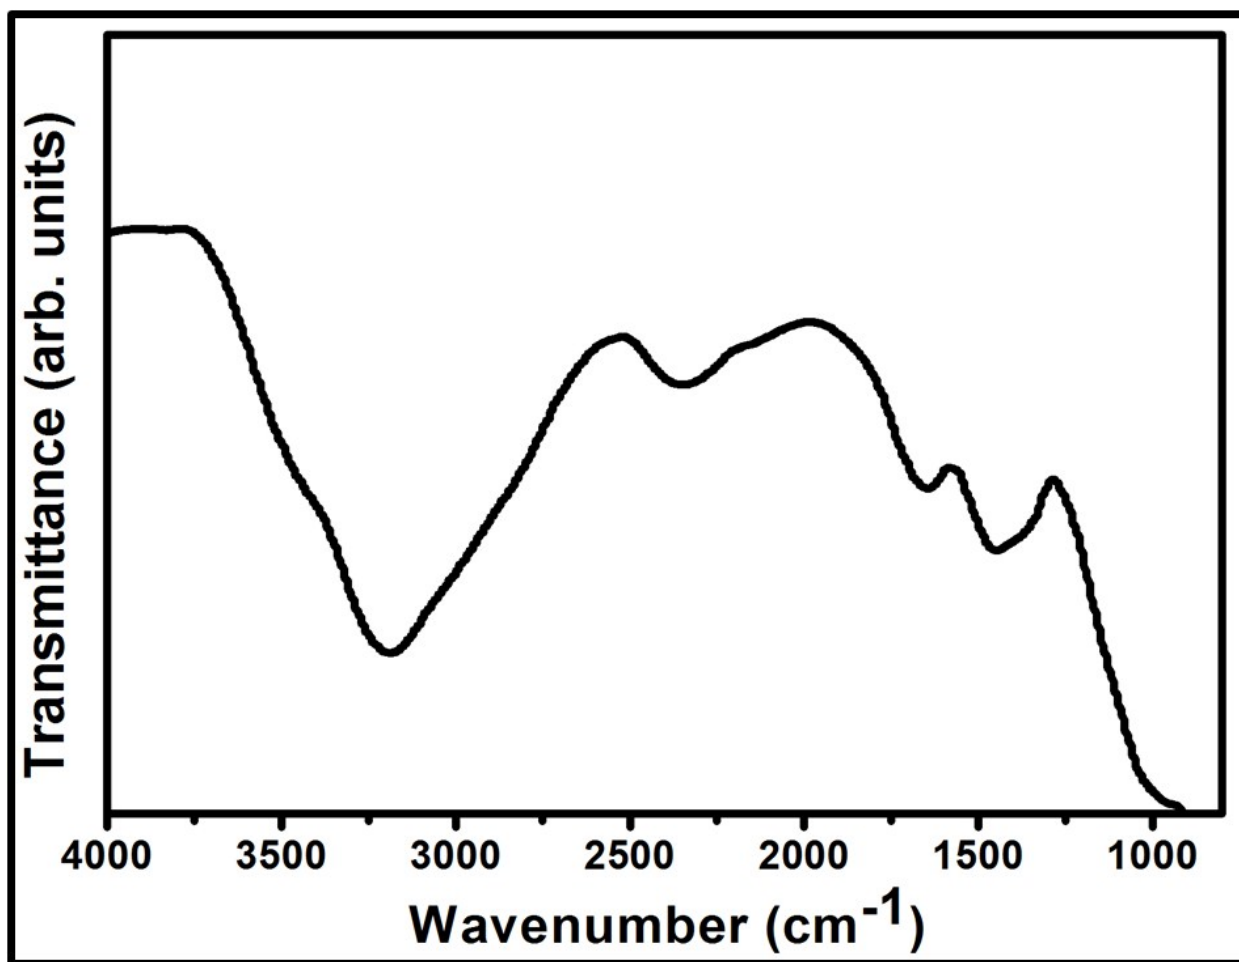

Fig. S6: FTIR spectrum of as-synthesized rGO.

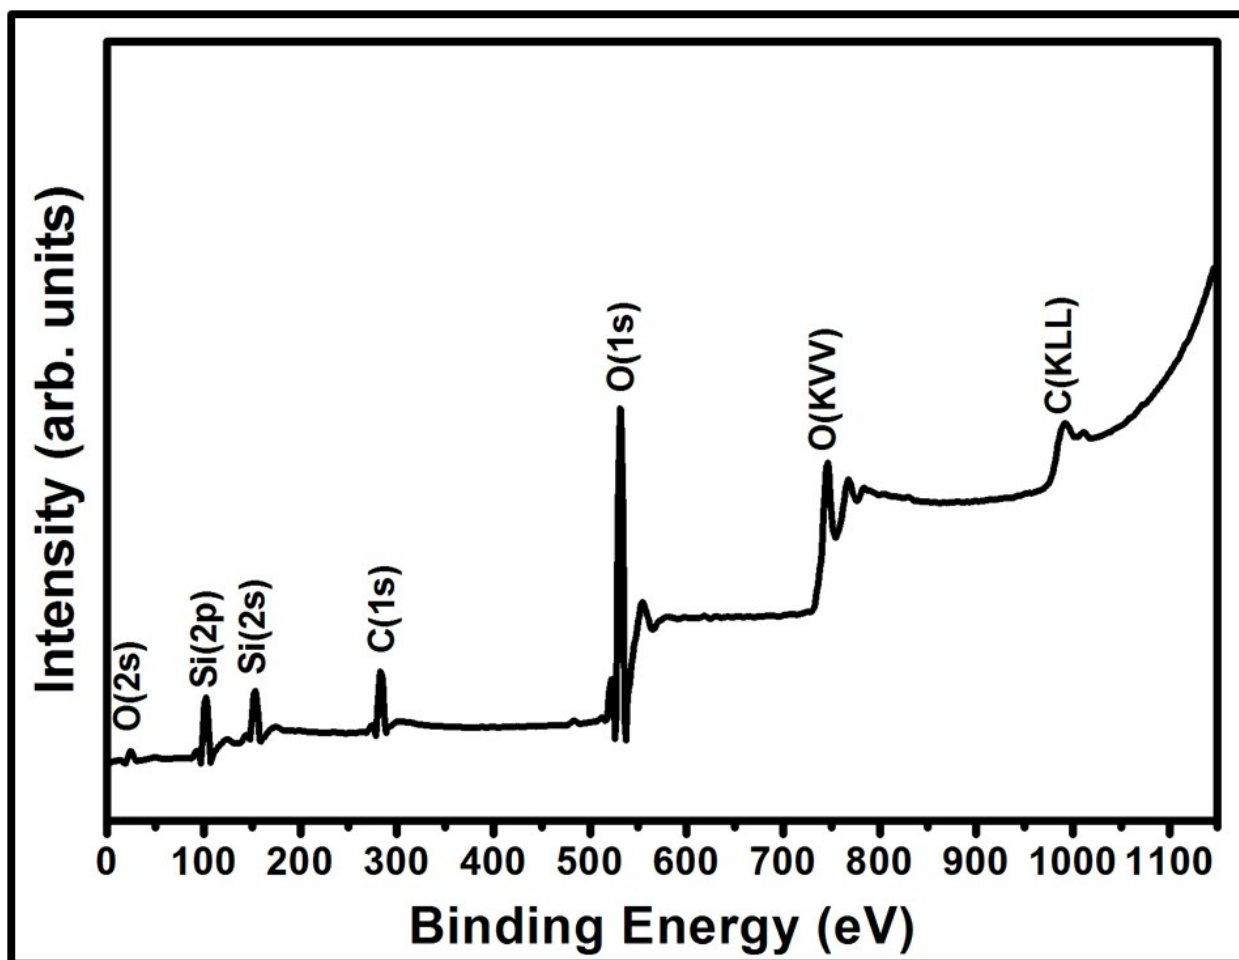

Fig. S7: XPS spectrum of as-synthesized rGO.

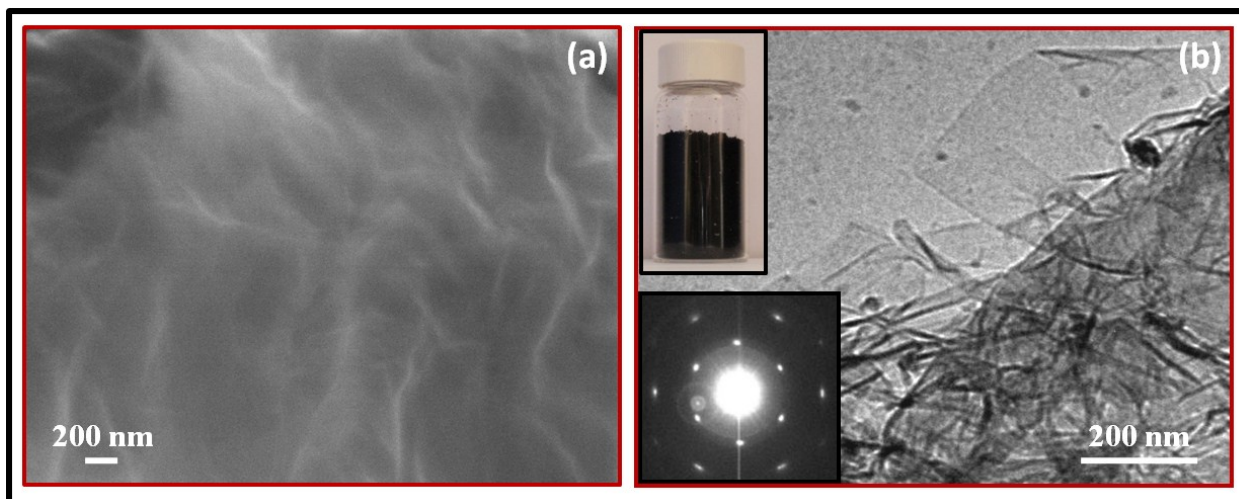

**Fig. S8.** (a) SEM image of as-synthesized rGO and (b) TEM image of as-synthesized rGO; lower inset part reveals the as-synthesized rGO powder and upper inset shows the SAED pattern of as-synthesized rGO.

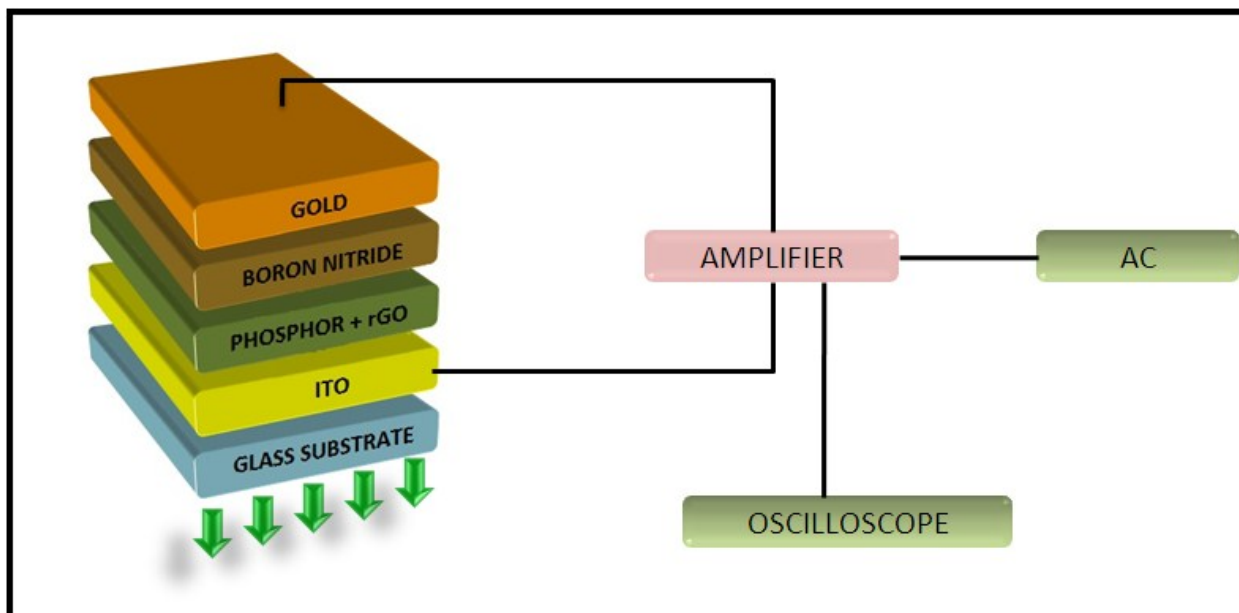

**Scheme S3.** Schematic diagram of EL device composed of ZnS:Cu,Al phosphor and rGO with luminescence measurement setup.

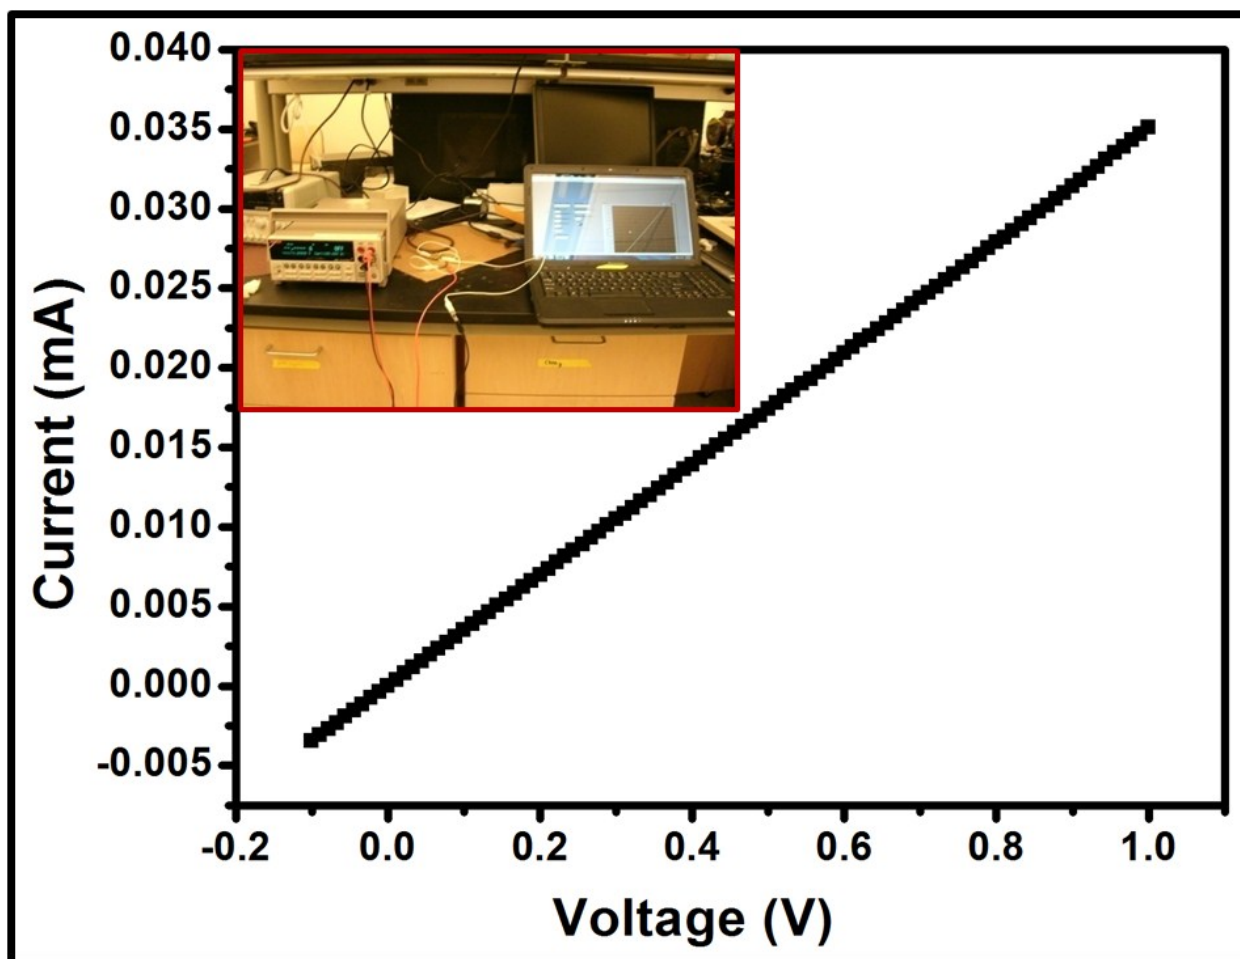

**Fig. S9:** I-V characteristics of EL device fabricated with ZnS:Cu,Al phosphor and 0.50 wt% rGO and inset shows the measurement setup.

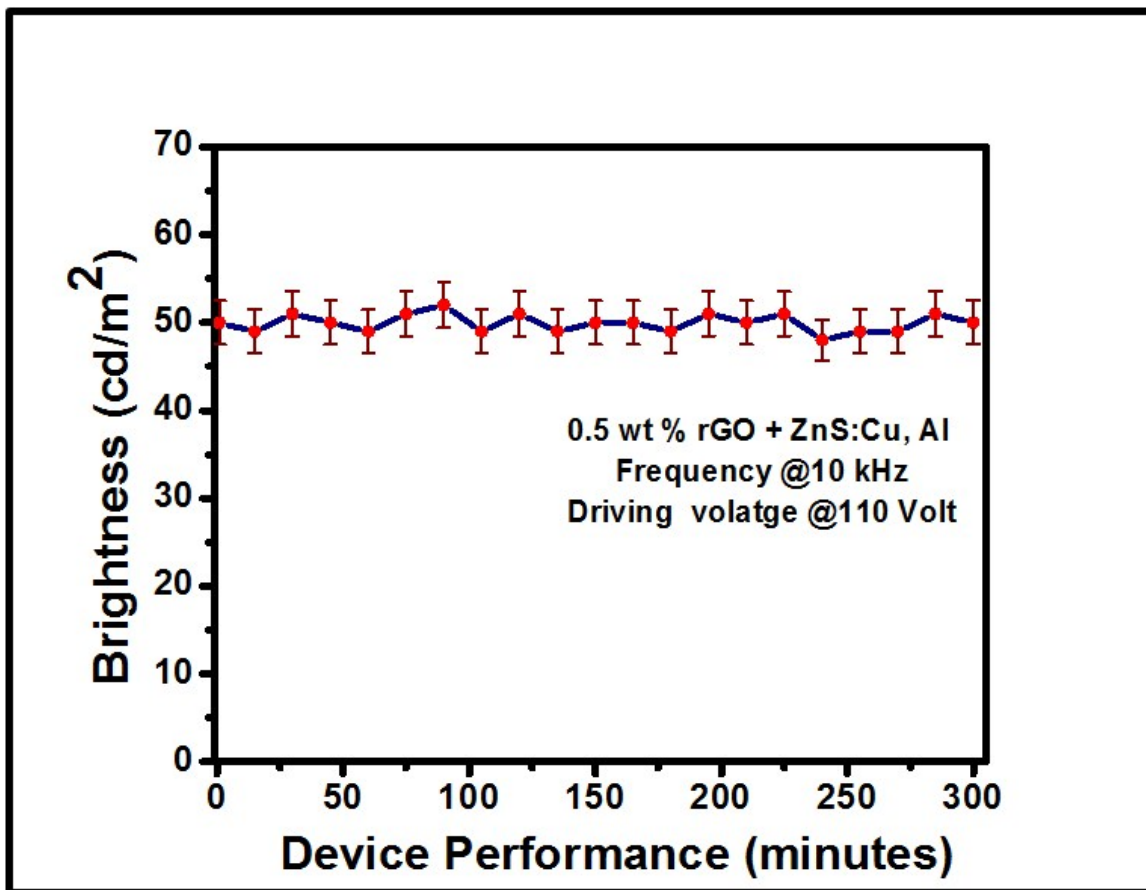

**Fig. S10:** Stability of the device in air is measured in terms of brightness of the EL devices vs time (minutes) in continuous manner for the device made by ZnS:Cu,Al phosphor composite with 0.5wt% rGO.

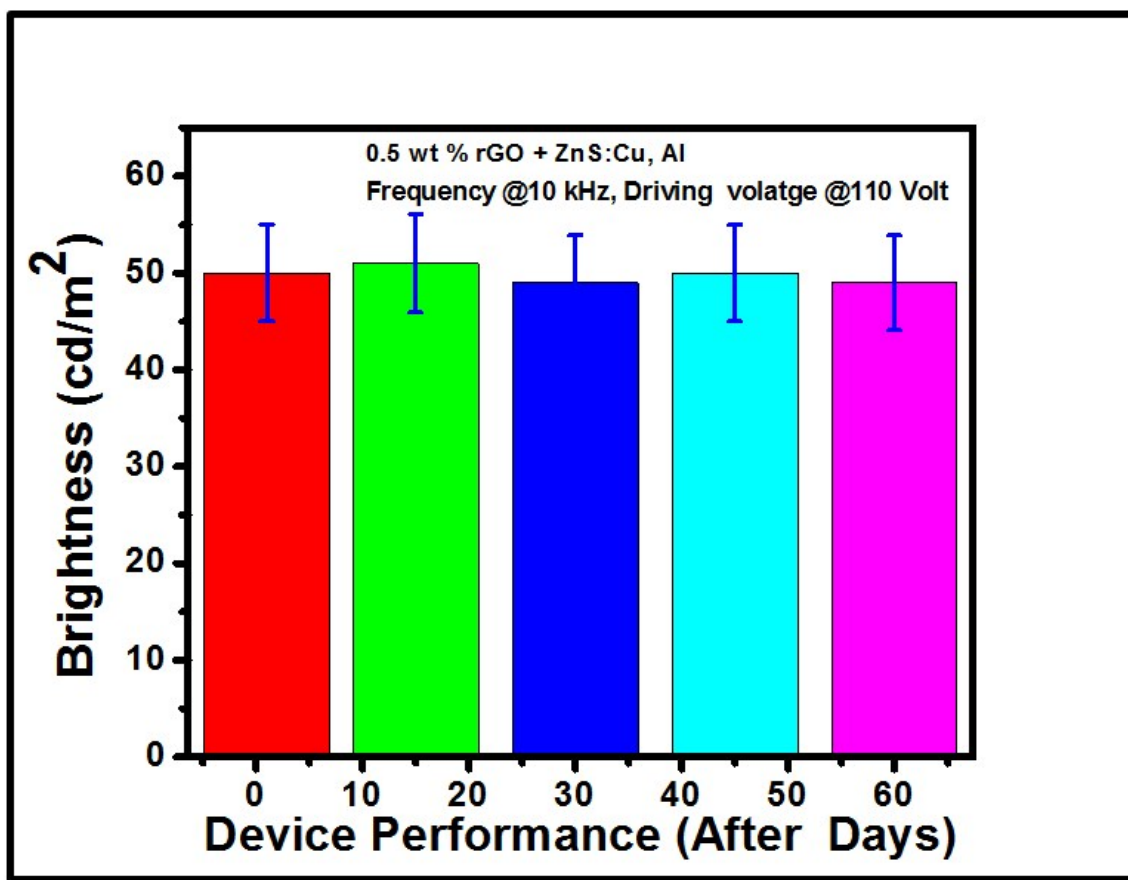

**Fig. S11:** Stability of the device in air is measured in terms of brightness of the EL devices vs non continuous days for the device made by ZnS:Cu,Al phosphor composite with 0.5wt% rGO to examine the performance after switch ON the device on different days .
